# Supplementary material for: The association between shift work and sick leave: a systematic review
Source: PubMed Central journal article supplement — Occup Environ Med. 2012 Oct;69(10):701–12. doi: 10.1136/oemed-2011-100488 (PMC3597215; doi:10.1136/oemed-2011-100488), 2012-10
Supplement: oemed-2011-100488-s1.pdf [file oemed-2011-100488-s1.pdf]

## APPENDIX A – Search Strategy

### Searches Medline, PsycINFO, and Cinahl using EBSCOhost

Search limits: 'peer reviewed' & 'human'

| Database                   | MeSH and Major Subject Headings                                                                                                                                                                                                                                                                                                                                                                                                                                                                                                                                                                                                                                                                                                                                                                                                                                                                                                                                                                                                                                                                                                                                                                                                                                                                                                                                                                                                                                                                                                                                    |
|----------------------------|--------------------------------------------------------------------------------------------------------------------------------------------------------------------------------------------------------------------------------------------------------------------------------------------------------------------------------------------------------------------------------------------------------------------------------------------------------------------------------------------------------------------------------------------------------------------------------------------------------------------------------------------------------------------------------------------------------------------------------------------------------------------------------------------------------------------------------------------------------------------------------------------------------------------------------------------------------------------------------------------------------------------------------------------------------------------------------------------------------------------------------------------------------------------------------------------------------------------------------------------------------------------------------------------------------------------------------------------------------------------------------------------------------------------------------------------------------------------------------------------------------------------------------------------------------------------|
| Medline                    | (MH "Work Schedule Tolerance+") OR (MH "Circadian Rhythm+") OR (MH "Sleep Disorders, Circadian Rhythm+") OR (MH "Personnel Staffing and Scheduling+") OR (MH "After-hours care+") OR (MH "Workload+") <b>AND</b> (MH "Sick Role+") OR (MH "Illness Behavior+") OR (MH "Absenteeism+") OR (MH "Sick Leave+") OR (MH "Occupational health+")                                                                                                                                                                                                                                                                                                                                                                                                                                                                                                                                                                                                                                                                                                                                                                                                                                                                                                                                                                                                                                                                                                                                                                                                                         |
| PsycINFO                   | (DE "Work Scheduling") OR (DE "Work Rest Cycles") OR (DE "Workday Shifts") OR (DE "Work Load") OR (DE "Work Week Length") OR (DE "Human Biological Rhythms") OR (DE "Biological Rhythms") <b>AND</b> (DE "Illness Behavior") OR (DE "Employee Absenteeism") OR (DE "Employee Leave Benefits") OR (DE "Work Related Illnesses")                                                                                                                                                                                                                                                                                                                                                                                                                                                                                                                                                                                                                                                                                                                                                                                                                                                                                                                                                                                                                                                                                                                                                                                                                                     |
| Cinahl                     | (MH "Work Schedule Tolerance+") OR (MH "Circadian Rhythm+") OR (MH "Sleep Disorders, Circadian Rhythm+") OR (MH "Personnel Staffing and Scheduling+") OR (MH "Workload+") <b>AND</b> (MH "Sick Role+") OR (MH "Illness Behavior+") OR (MH "Absenteeism+") OR (MH "Sick Leave+") OR (MH "Occupational health+")                                                                                                                                                                                                                                                                                                                                                                                                                                                                                                                                                                                                                                                                                                                                                                                                                                                                                                                                                                                                                                                                                                                                                                                                                                                     |
|                            | <b>General word search</b>                                                                                                                                                                                                                                                                                                                                                                                                                                                                                                                                                                                                                                                                                                                                                                                                                                                                                                                                                                                                                                                                                                                                                                                                                                                                                                                                                                                                                                                                                                                                         |
| Medline, PsycINFO & Cinahl | shiftwork OR nightwork OR nightshift OR (shift* N2 work*) OR (shift* N2 system*) OR (shift* N2 schedul*) OR (shift* N2 rotat*) OR (shift* N2 pattern*) OR (night* N2 shift) OR (night* N2 work*) OR (night* N2 schedul*) OR (evening N2 work) OR (evening N2 shift*) OR (morning N2 work) OR (morning N2 shift*) OR (irregular* N2 shift*) OR (irregular* N2 work* N2 hour*) OR (irregular* N2 schedul*) OR (non-standard N2 schedul*) OR (non-standard N2 rotat*) OR (nonstandard N2 schedul*) OR (nonstandard N2 rotat*) OR (work* N2 schedul*) OR (roster*) OR (long N2 work* N2 hour*) OR (hour* N2 long) OR (hour* N2 extend*) OR (long N2 day*) OR (week* N2 work* N2 hour*) OR (hour* N2 12) OR (hour* N2 twelve) OR (hour* N2 80) OR (hour* N2 84) OR (work* N2 week N2 80) OR (work* N2 week N2 84) OR (working N2 time N2 arrangement*) OR (worktime N2 arrangement*) OR (work N2 arrangement*) OR (weekend N2 work*) OR (extend* N2 week*) OR (compress* N2 hour*) OR (compress* N2 week*) <b>AND</b> (long-term N2 sickness N2 absen*) OR (long-term N2 sickness N2 leave*) OR (short-term N2 sickness N2 absen*) OR (short-term N2 sick* N2 leave) OR (temporary N2 sick-leave) OR (sick* N2 absen*) OR (sick* N2 leave) OR (sick* N2 day*) OR (sick* N2 spells*) OR (sick* N2 list*) OR (sick* N2 role) OR (work N2 absen*) OR (absenteeism) OR (days N2 off) OR (absen* N2 spell*) OR (absen* N2 day*) OR (illness N2 day*) OR (illness N2 spell*) OR (illness N2 behavio#r) OR (time N2 return N2 work) OR (duration N2 absence) OR (work N2 loss) |

### Online searches

NIOSHTIC-2 : <http://www2.cdc.gov/nioshtic-2/>

| Database   | General word search                                                                                                                                                        |
|------------|----------------------------------------------------------------------------------------------------------------------------------------------------------------------------|
| NIOSHTIC-2 | shiftwork OR "shift work" OR "shift system" OR "shift schedule" OR "shift rotation" OR "night shift" OR "extend work" OR "work organisation" <b>AND</b> "Sickness absence" |

ISI Web of Science: [www.webofknowledge.com](http://www.webofknowledge.com)

Search limits: Topic search

| Database           | General word search                                                                                                                                                                                                                                                                                                                                                                                                                                                                                                                                                                                                                                                                                                                                                                                                                                                                                                                                                                                                                                                                                |
|--------------------|----------------------------------------------------------------------------------------------------------------------------------------------------------------------------------------------------------------------------------------------------------------------------------------------------------------------------------------------------------------------------------------------------------------------------------------------------------------------------------------------------------------------------------------------------------------------------------------------------------------------------------------------------------------------------------------------------------------------------------------------------------------------------------------------------------------------------------------------------------------------------------------------------------------------------------------------------------------------------------------------------------------------------------------------------------------------------------------------------|
| ISI Web of Science | <p>shiftwork OR nightwork OR nightshift OR ("shift* work*") OR ("shift* system*") OR ("shift* 2chedule*") OR ("shift* rotat*") OR ("night* shift") OR ("night* work*") OR ("night* 2chedule*") OR ("evening work") OR ("morning work") OR ("morning shift*") OR ("irregular* shift*") OR ("irregular* work* hour*") OR ("irregular* 2chedule*") OR ("nonstandard 2chedule*") OR ("80 hour workweek") OR ("84 hour workweek") OR ("12 hour shift") OR (weekly work* hour*) OR ("long working hours") OR (roster*) OR ("rotation schedule") OR ("working time arrangement*") OR ("work time arrangement*") OR ("weekend work") OR ("extend* week*") OR ("compress* week*") OR ("compress* hours") OR ("extend* hours") <b>AND</b> ("long-term sickness absen*") OR ("long-term sickness leave*") OR ("short-term sickness absen*") OR ("short-term sick leave") OR ("sick* absen*") OR ("sick* leave") OR ("sick* day*") OR ("sick* list*") OR ("work absen*") OR (absenteeism) OR ("illness day*") OR ("illness behaviour") OR ("time to return work") OR ("absence duration") OR ("work loss")</p> |

EMBASE: [www.embase.com](http://www.embase.com)

Search limits: 'Exclude Medline' & 'human'

| Database | Search strategy: MeSH &EMTREE search                                                                                                                                                                                                                                                                                                                                                                                                                                                                                                                                                                                                                                                                                                                                                                                                                                                                                                                                                                                                                                                                                                                                                                                                                                                                                                                                                                                                                                                                                                                                                                                                                                                                                                                                                                                                                                                                                                                                                                                                                                                                                                             |
|----------|--------------------------------------------------------------------------------------------------------------------------------------------------------------------------------------------------------------------------------------------------------------------------------------------------------------------------------------------------------------------------------------------------------------------------------------------------------------------------------------------------------------------------------------------------------------------------------------------------------------------------------------------------------------------------------------------------------------------------------------------------------------------------------------------------------------------------------------------------------------------------------------------------------------------------------------------------------------------------------------------------------------------------------------------------------------------------------------------------------------------------------------------------------------------------------------------------------------------------------------------------------------------------------------------------------------------------------------------------------------------------------------------------------------------------------------------------------------------------------------------------------------------------------------------------------------------------------------------------------------------------------------------------------------------------------------------------------------------------------------------------------------------------------------------------------------------------------------------------------------------------------------------------------------------------------------------------------------------------------------------------------------------------------------------------------------------------------------------------------------------------------------------------|
| EMBASE   | 'work schedule'/exp OR 'working time'/exp OR 'circadian rhythm'/exp OR 'circadian rhythm sleep disorder'/exp                                                                                                                                                                                                                                                                                                                                                                                                                                                                                                                                                                                                                                                                                                                                                                                                                                                                                                                                                                                                                                                                                                                                                                                                                                                                                                                                                                                                                                                                                                                                                                                                                                                                                                                                                                                                                                                                                                                                                                                                                                     |
| Database | Search strategy: General word search                                                                                                                                                                                                                                                                                                                                                                                                                                                                                                                                                                                                                                                                                                                                                                                                                                                                                                                                                                                                                                                                                                                                                                                                                                                                                                                                                                                                                                                                                                                                                                                                                                                                                                                                                                                                                                                                                                                                                                                                                                                                                                             |
| EMBASE   | <p>(shiftwork) OR (nightwork) OR (nightshift) OR (shift* NEAR/2 work*) OR (shift* NEAR/2 system*) OR (shift* NEAR/2 schedul*) OR (shift* NEAR/2 rotat*) OR (shift* NEAR/2 pattern*) OR (night* NEAR/2 shift) OR (night* NEAR/2 work*) OR (night* NEAR/2 schedul*) OR (evening NEAR/2 work) OR (evening NEAR/2 shift*) OR (morning NEAR/2 work) OR (morning NEAR/2 shift*) OR (irregular* NEAR/2 shift*) OR ((irregular* NEAR/2 work*) OR (work* NEAR/2 hour*)) OR (irregular* NEAR/2 schedule) OR (non standard NEAR/2 schedul*) OR (non standard NEAR/2 rotat*) OR (nonstandard NEAR/2 schedule*) OR (nonstandard NEAR/2 rotat*) OR (work* NEAR/2 schedul*) OR (roster*) OR ((Long NEAR/2 work*) AND (work* NEAR/2 hour*)) OR (hour* NEAR/2 long) OR (hour* NEAR/2 extend*) OR (Long NEAR/2 day*) OR ((Week* NEAR/2 work*) AND (work* NEAR/2 hour*)) OR (hour* NEAR/2 12) OR (hour* NEAR/2 twelve) OR (hour* NEAR/2 80) OR (hour* NEAR/2 84) OR ((work* NEAR/2 week) AND (week NEAR/2 80)) OR ((work* NEAR/2 week) AND (week NEAR/2 84)) OR ((Working NEAR/2 time) AND (time NEAR/2 arrangement*)) OR (Worktime NEAR/2 arrangement*) OR (Work NEAR/2 arrangement*) OR (weekend NEAR/2 work*) OR (Extend* NEAR/2 week*) OR (Compress* NEAR/2 hour*) OR (Compress* NEAR/2 week*) <b>AND</b> 'illness behavior'/exp OR 'absenteeism'/exp OR 'medical leave'/exp OR ((long term NEAR/2 sickness) AND (sickness NEAR/2 absen*)) OR ((long term NEAR/2 sickness) AND (sickness NEAR/2 leave)) OR ((short term NEAR/2 sickness) AND (sickness NEAR/2 absen*)) OR ((short term NEAR/2 sickness) AND (sickness NEAR/2 leave)) OR (temporary NEAR/2 sick leave) OR (sick* NEAR/2 absen*) OR (sick* NEAR/2 leave) OR (sick* NEAR/2 day*) OR (sick* NEAR/2 spells*) OR (sick* NEAR/2 list*) OR (sick* NEAR/2 role) OR (work NEAR/2 absen*) OR (absenteeism) OR (days NEAR/2 off) OR (absen* NEAR/2 spell*) OR (absen* NEAR/2 day*) OR (illness NEAR/2 day*) OR (illness NEAR/2 spell*) OR (illness NEAR/2 behavior) OR (illness NEAR/2 behaviour) OR ((time NEAR/2 return) AND (return NEAR/2 work)) OR (duration NEAR/2 absence) OR (work NEAR/2 loss)</p> |
